# Supplementary material for: SpikeInterface, a unified framework for spike sorting
Source: eLife journal article supplement (doi:10.7554/elife.61834), 2020-11-10
Supplement: supp [file elife-61834-supp-v1.zip]

Archive with 8 entries (8 files):
- elife_poa_e61834_Transparent_Reporting_File.pdf
- elife_poa_e61834_Figure_1_figure_supplement_1.pdf
- elife_poa_e61834_Figure_1_figure_supplement_2.pdf
- elife_poa_e61834_Figure_1_figure_supplement_3.pdf
- elife_poa_e61834_Figure_1_figure_supplement_4.pdf
- elife_poa_e61834_Figure_2_figure_supplement_1.pdf
- elife_poa_e61834_Figure_3_figure_supplement_1.pdf
- elife_poa_e61834_Figure_3_figure_supplement_2.pdf
