# Supplementary material for: SpikeInterface, a unified framework for spike sorting
Source: eLife journal article supplement (doi:10.7554/elife.61834), 2020-11-10

Fraction of units

1.00  
0.95  
0.90  
0.85  
0.80  
0.75  
0.70

False positives  
in single sorting

True positives  
in ensemble sorting

Number of  
sorters

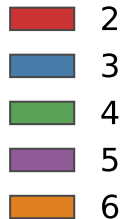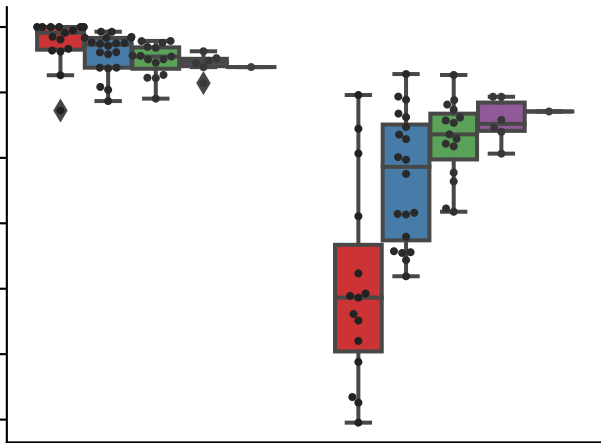

Supplement: supp [file elife-61834-supp-v1.zip › elife_poa_e61834_Figure_3_figure_supplement_1.pdf]
