# Supplementary figures and images for: SpikeInterface, a unified framework for spike sorting
Source: eLife journal article supplement (doi:10.7554/elife.61834), 2020-11-10

A

Average agreement: 0.97

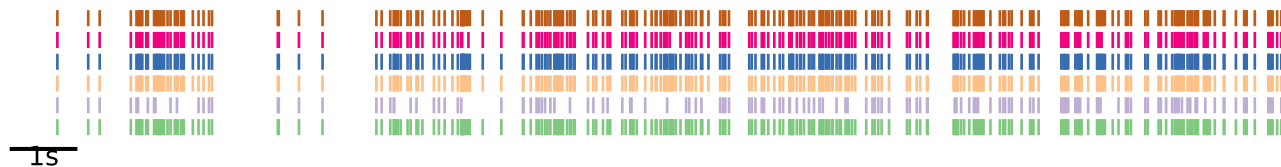

HDS

HS

IC

KS

SC

TDC

B

Average agreement: 0.69

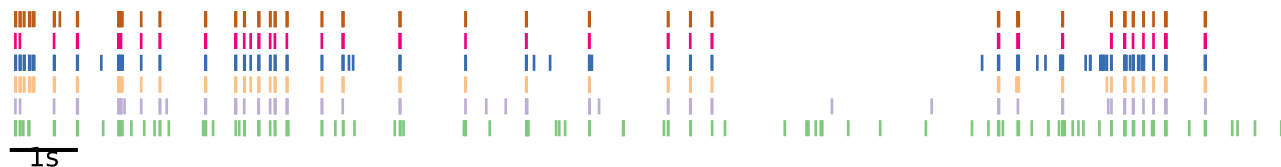

HDS

HS

IC

KS

SC

TDC

Supplement: supp [file elife-61834-supp-v1.zip › elife_poa_e61834_Figure_1_figure_supplement_1.pdf]

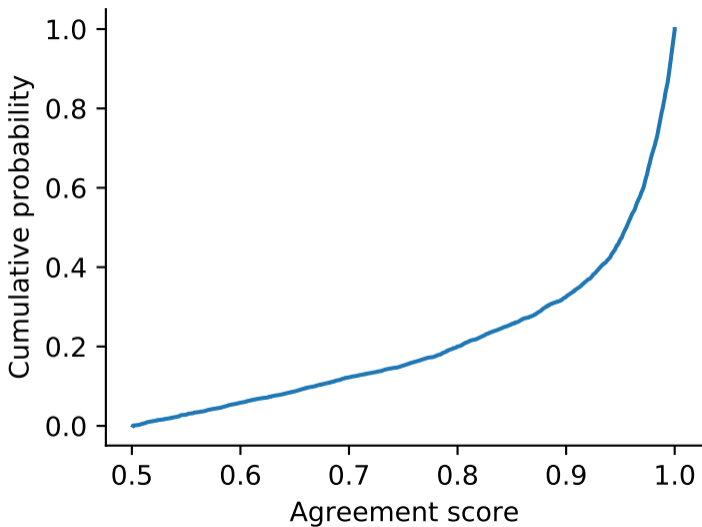

Supplement: supp [file elife-61834-supp-v1.zip › elife_poa_e61834_Figure_1_figure_supplement_2.pdf]

A

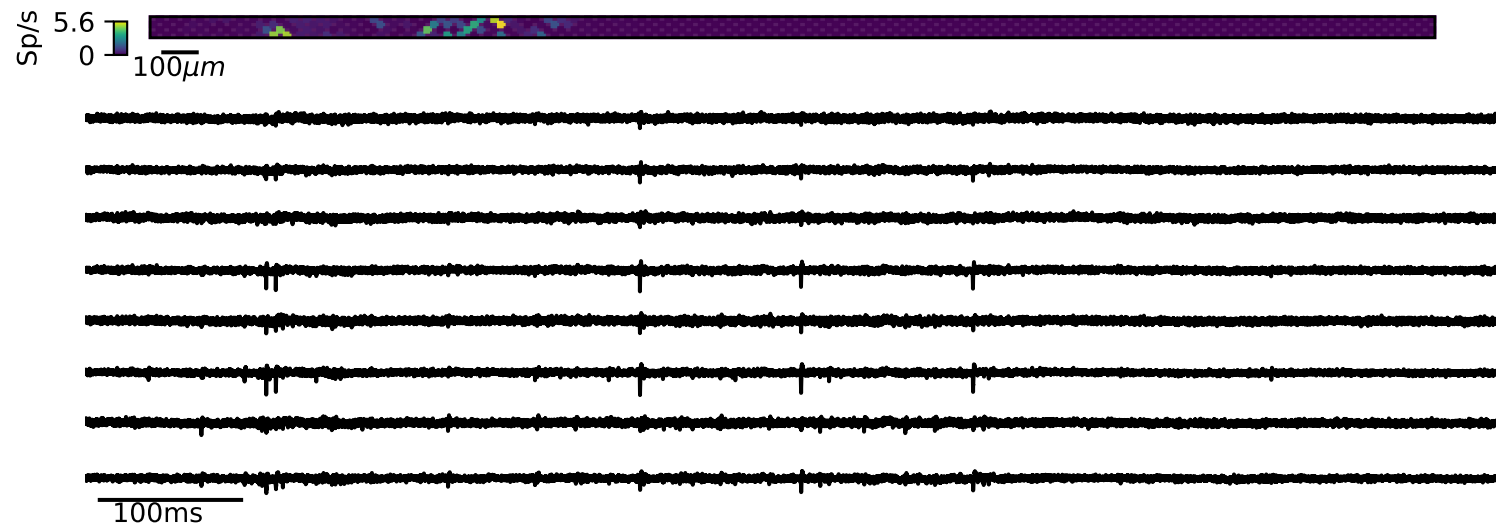

B

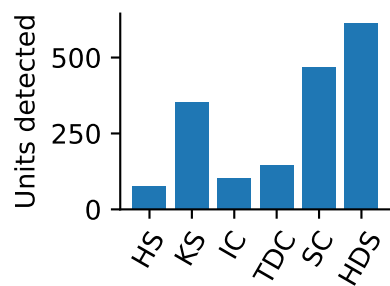

D

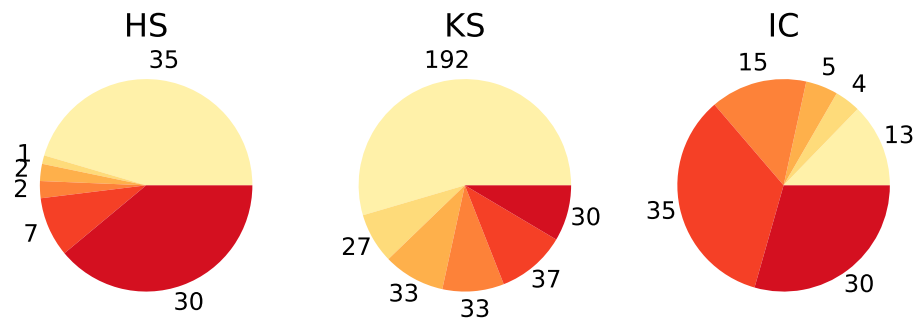

C

Units agreed upon  
by k sorters

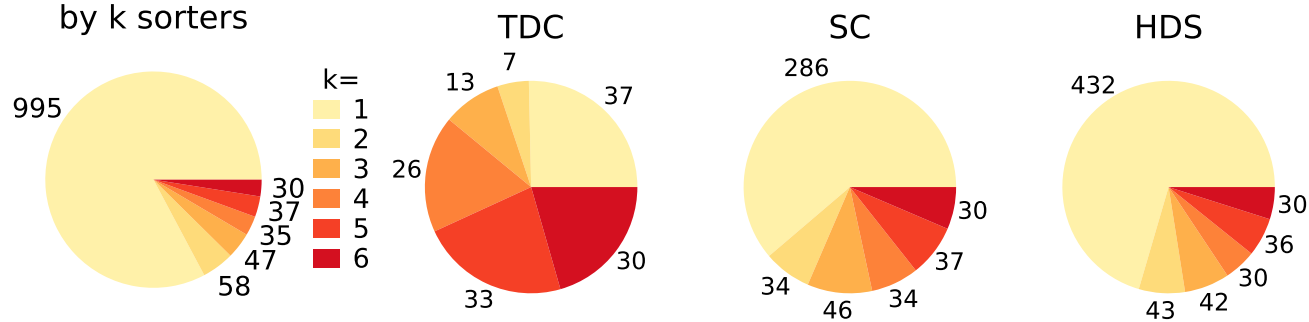

Supplement: supp [file elife-61834-supp-v1.zip › elife_poa_e61834_Figure_1_figure_supplement_3.pdf]

A

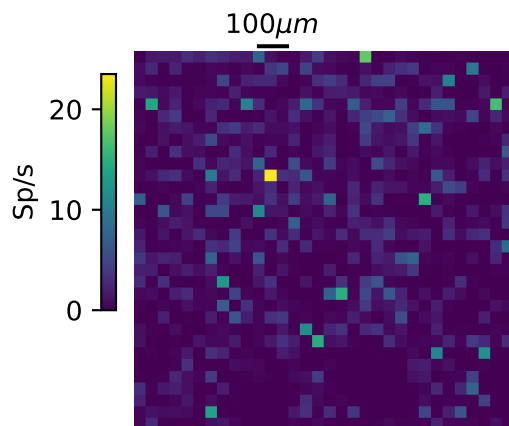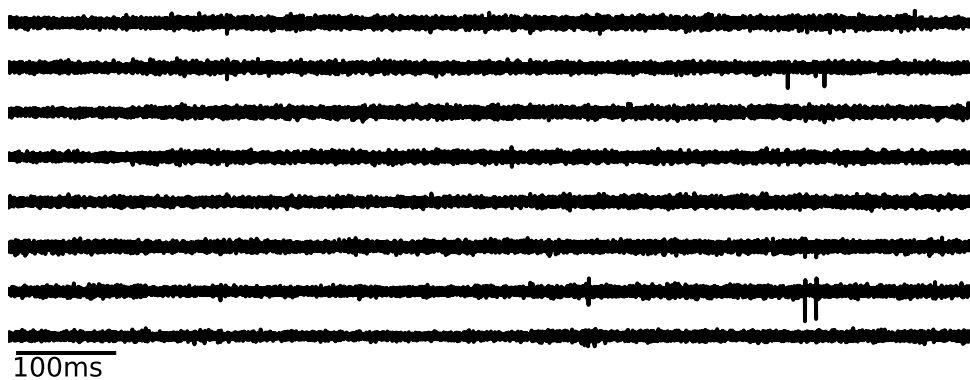

B

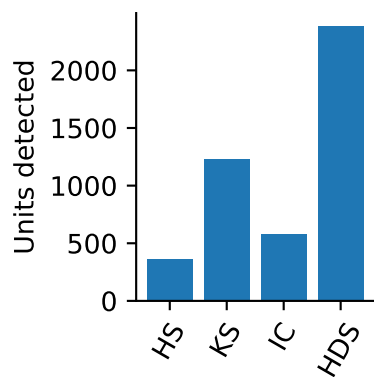

D

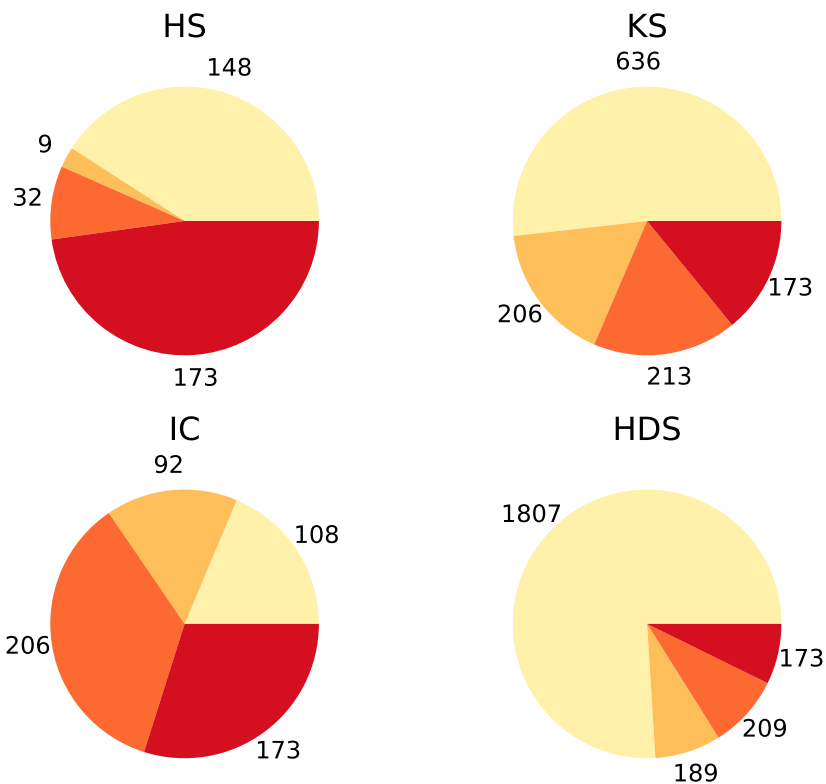

C

Units agreed upon  
by  $k$  sorters

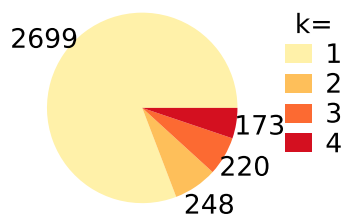

Supplement: supp [file elife-61834-supp-v1.zip › elife_poa_e61834_Figure_1_figure_supplement_4.pdf]

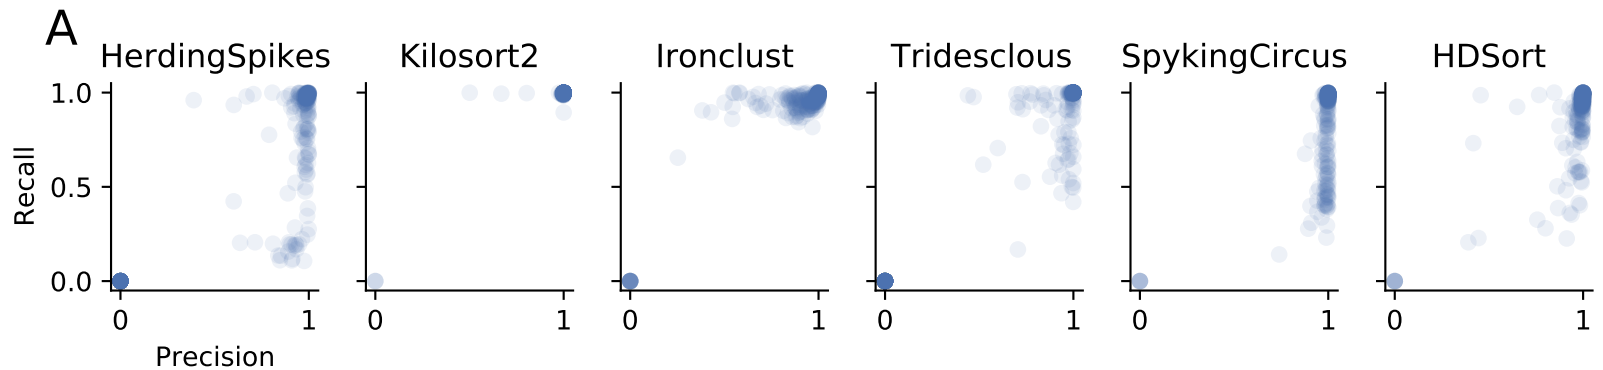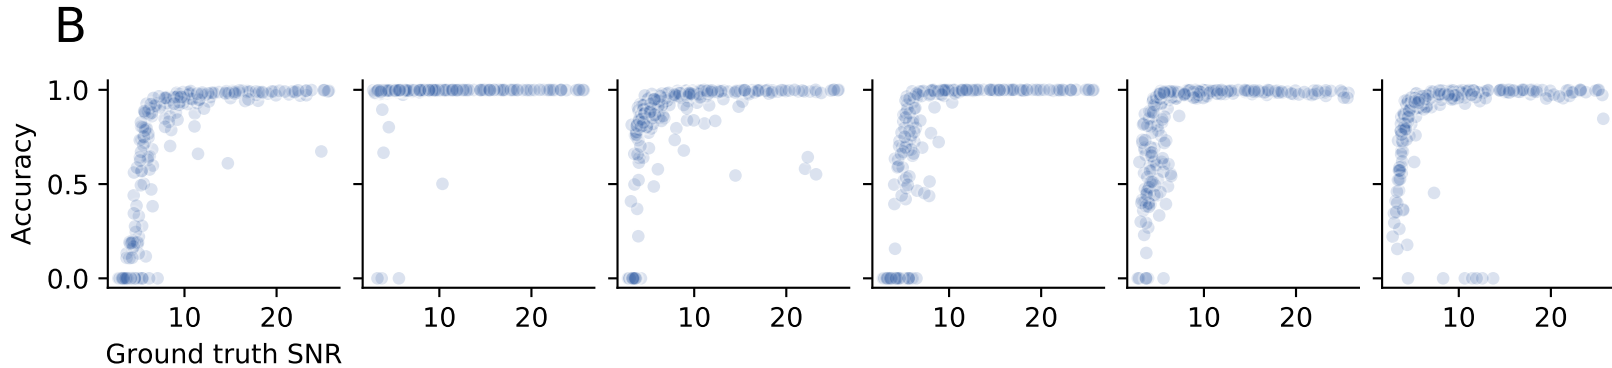

Supplement: supp [file elife-61834-supp-v1.zip › elife_poa_e61834_Figure_2_figure_supplement_1.pdf]

Number of units

matched units  
unmatched units

SNR

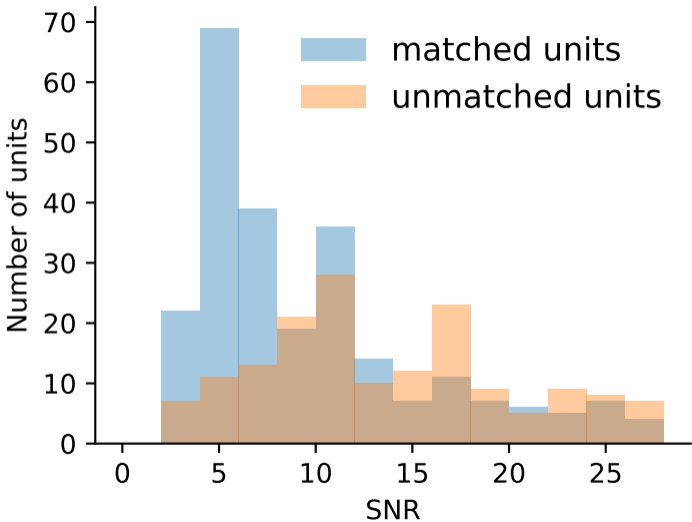

Supplement: supp [file elife-61834-supp-v1.zip › elife_poa_e61834_Figure_3_figure_supplement_2.pdf]
